# Supplementary material for: Progestin effects on cell proliferation pathways in the postmenopausal mammary gland
Source: PubMed Central journal article supplement (PMC3978455; doi:10.1186/bcr3456), 2013-08-12
Supplement: bcr3456-S2.pdf [file bcr3456-S2.pdf]

**A**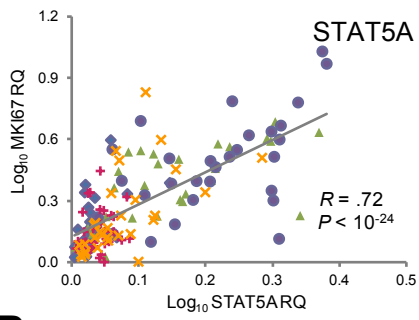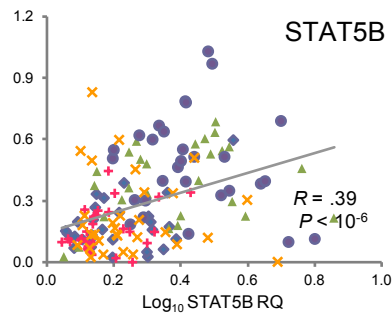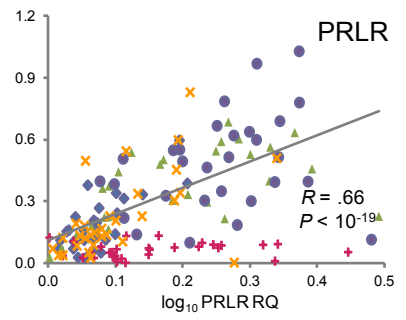**B**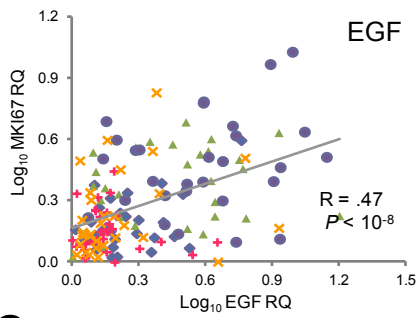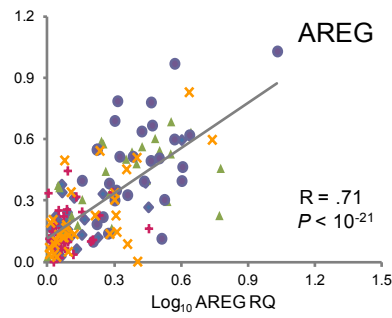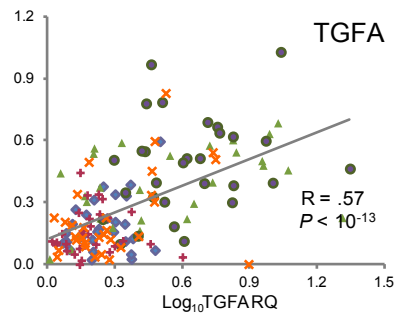**C**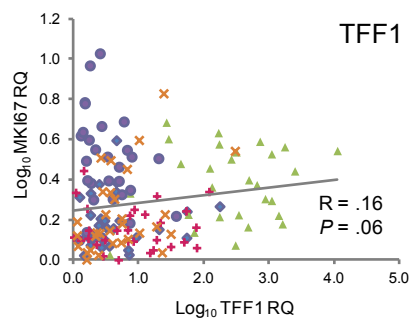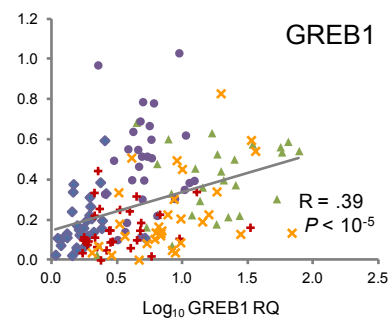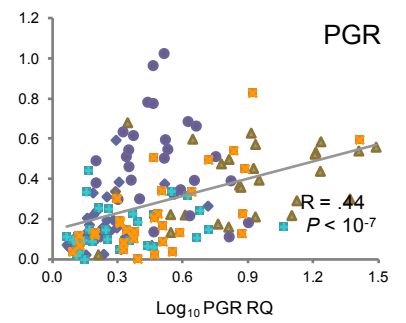

◆ Con ▲ CEE ● CEE+MPA + Lo Tib × Hi Tib
