# Supplementary material for: Progestin effects on cell proliferation pathways in the postmenopausal mammary gland
Source: PubMed Central journal article supplement (PMC3978455; doi:10.1186/bcr3456), 2013-08-12

**A**

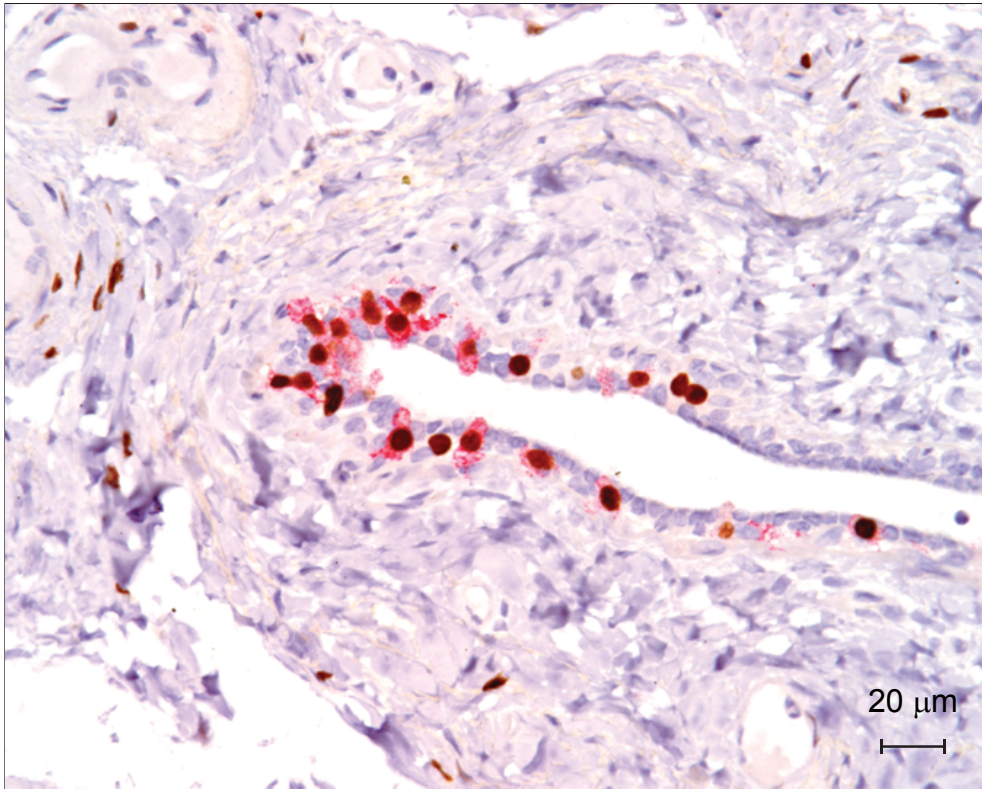

**B**

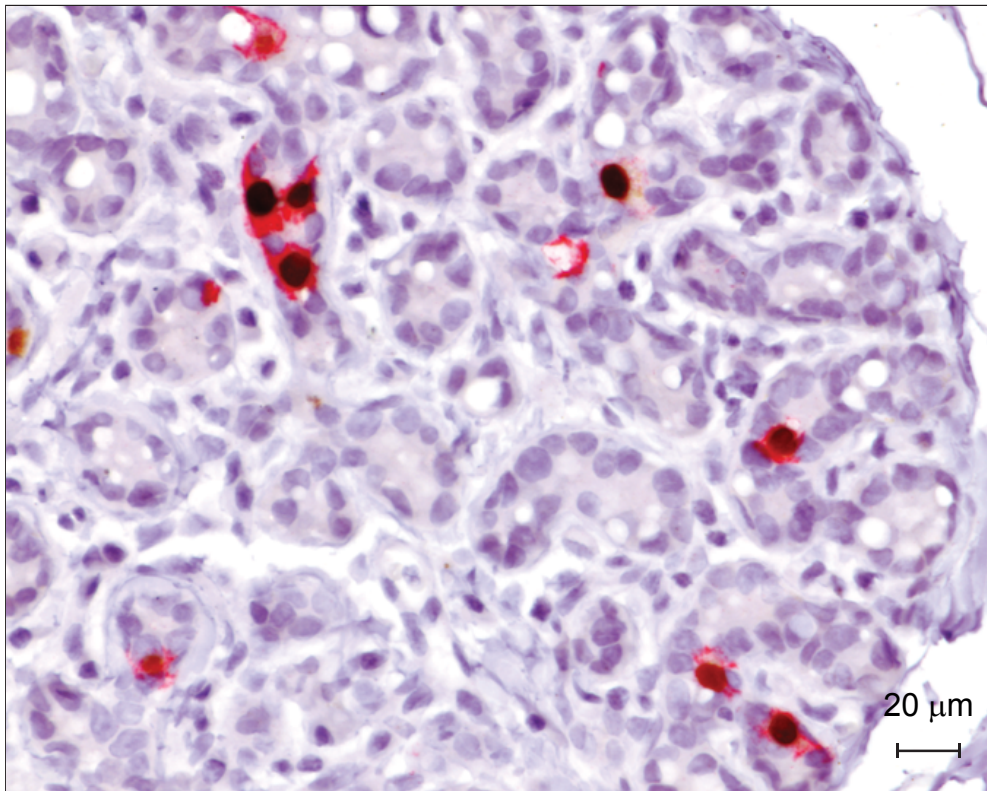

Supplement: bcr3456-S5.pdf [file bcr3456-S5.pdf]
